# Supplementary material for: Brine Infiltration in the Middle to Lower Crust in a Collision Zone: Mass Transfer and Microtexture Development Through Wet Grain–Boundary Diffusion
Source: Oxford University Press journal article supplement (doi:10.1093/petrology/egy116), 2018-12-04
Supplement: egy116_supplementary_figure_s1.pdf [file egy116_supplementary_figure_s1.pdf]

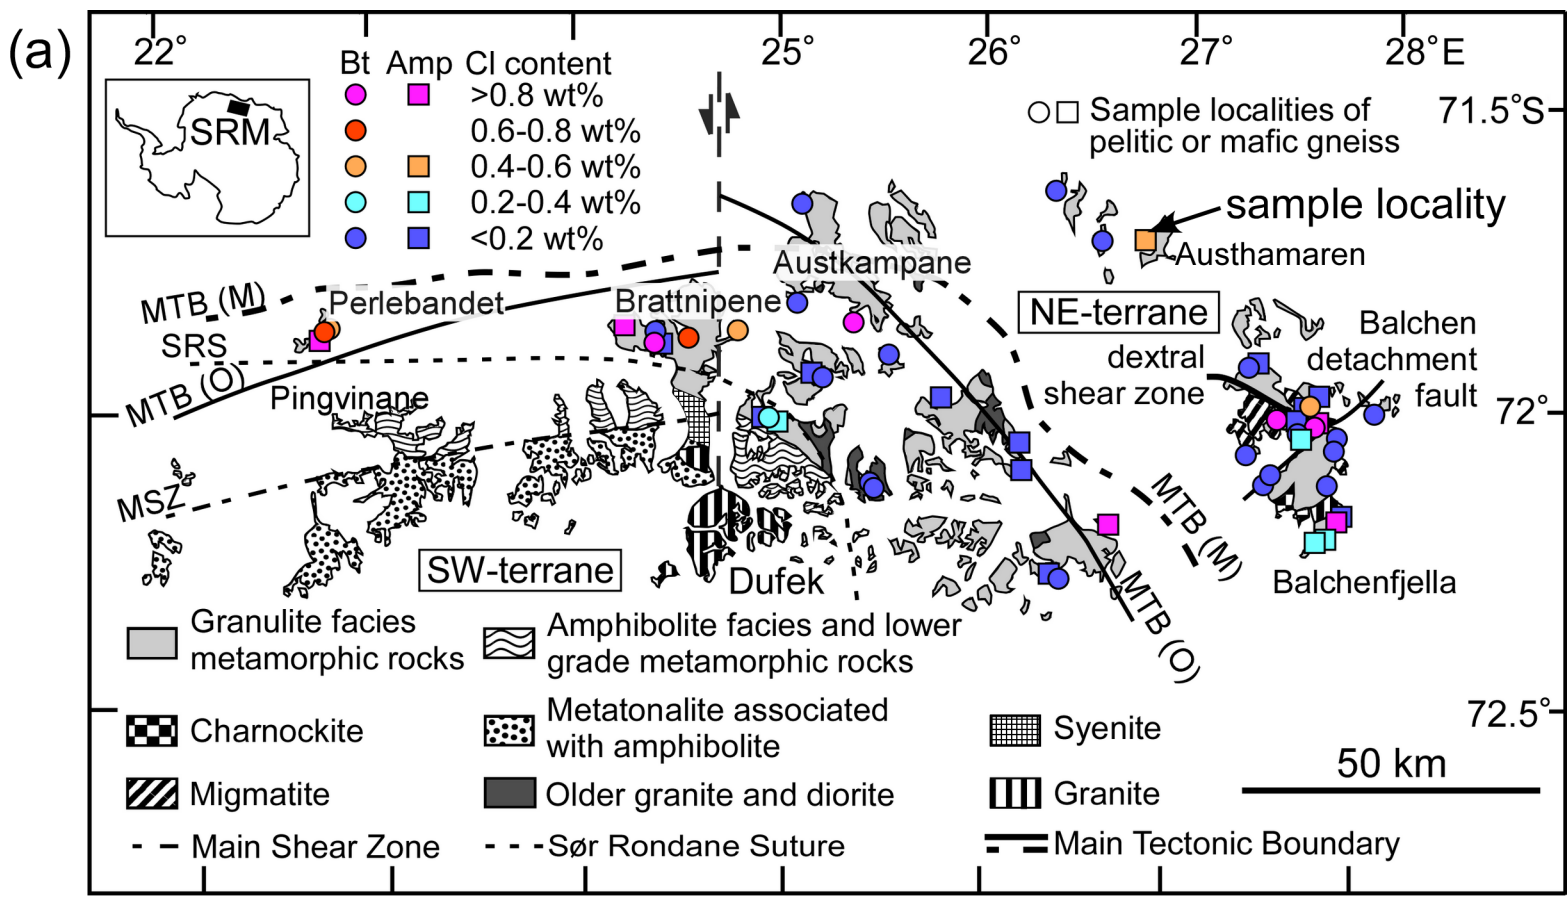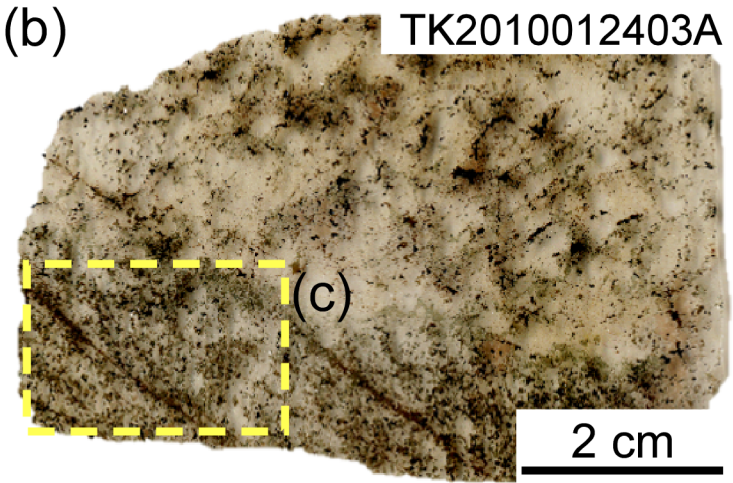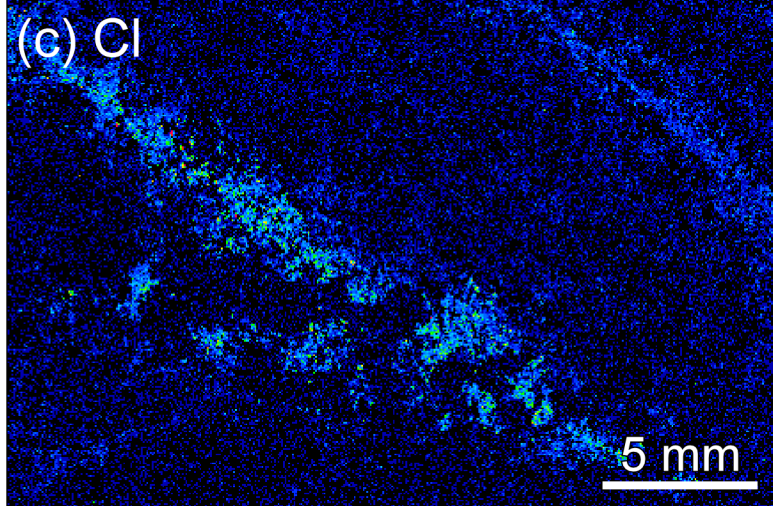

Supplementary Data Electronic Appendix Figure 1.  
 Sample TK2010012403A from Austhamaren. (a) Simplified geological map of the SRM, representing the sample locality. (b) Photo of a whole thin section. Two cracks filled with hornblende discordantly cut the gneissic structure. The yellow boxed area represents the area of an X-ray elemental map in (c). PPL. (c) X-ray elemental map in Cl showing Cl concentration of hornblende grains decreases with distance from the crack. Hornblende in the center of the crack has 0.45 wt% Cl, whereas hornblende in the wall rock has 0.24 wt% Cl.
