# Supplementary material for: Brine Infiltration in the Middle to Lower Crust in a Collision Zone: Mass Transfer and Microtexture Development Through Wet Grain–Boundary Diffusion
Source: Oxford University Press journal article supplement (doi:10.1093/petrology/egy116), 2018-12-04
Supplement: egy116_supplementary_figure_s2.pdf [file egy116_supplementary_figure_s2.pdf]

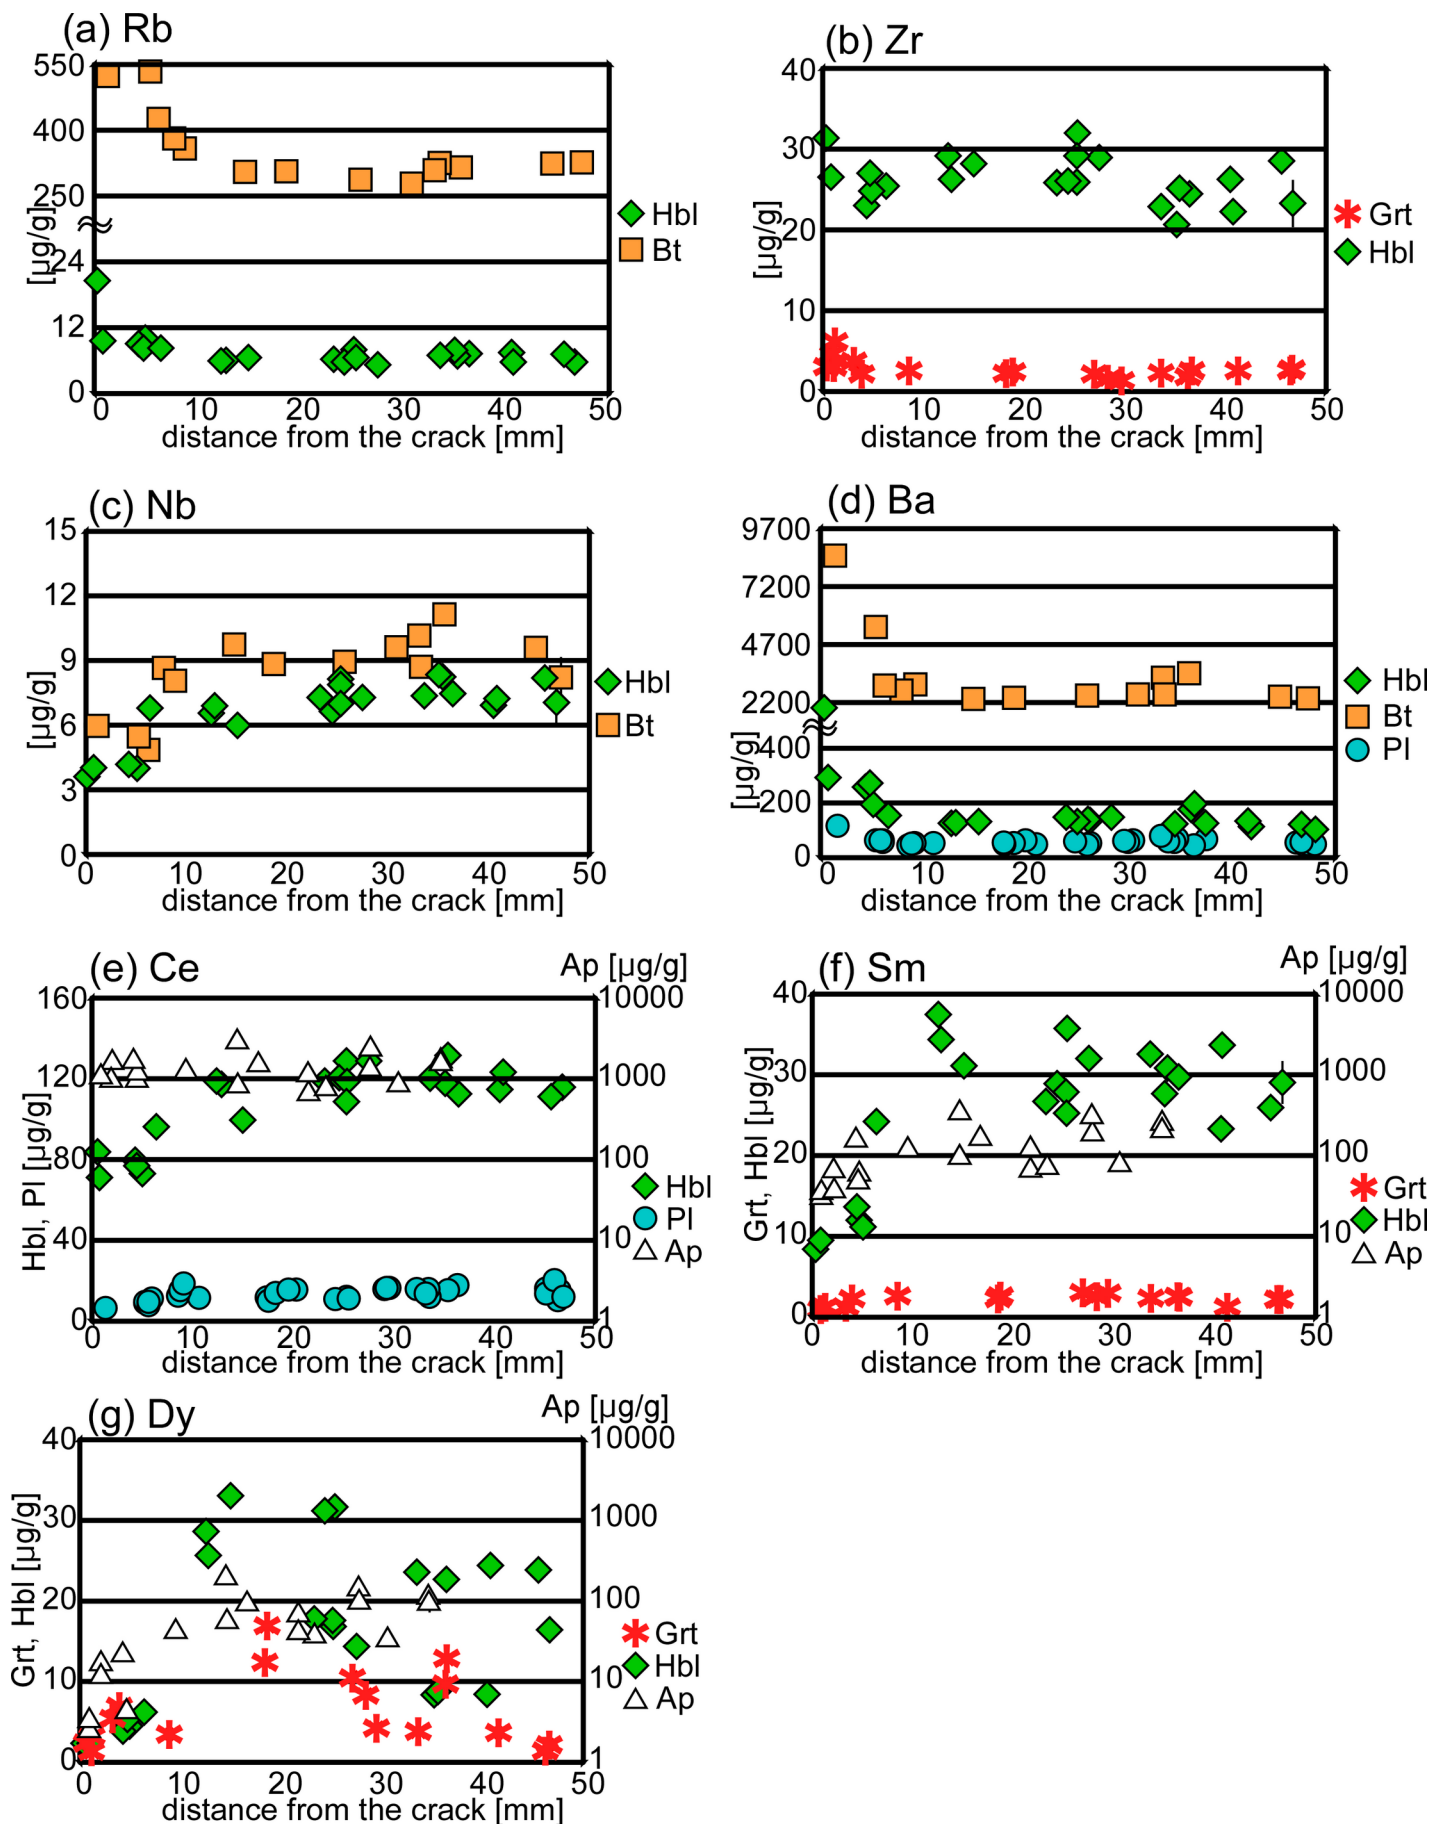

Supplementary Data Electronic Appendix Figure 2.

(a) Change of Rb concentrations of hornblende and biotite. The concentrations exponentially decrease and become constant at ~ 12-15 mm from the crack. (b) Zirconium concentration of garnet and hornblende is broadly constant. (c) Change of Nb concentrations of hornblende and biotite. The exponentially increasing profiles becomes flat at ~ 12-15 mm. (d) Change of Ba concentrations of hornblende, biotite and plagioclase. The exponentially decreasing profiles are observed. (e) Cerium concentration of hornblende and plagioclase show exponentially increasing profiles, whereas Ce content of apatite is broadly constant. (f) Change of Sm concentrations of garnet, hornblende, and apatite. They show exponentially increasing profiles and become constant at ~ 15 mm. (g) Change of Dy concentrations of garnet, hornblende, and apatite. Apatite and hornblende show the exponentially increasing profiles, whereas garnet shows a parabolic profile similar to Sc (cf. Fig. 7b).
